# Supplementary material
Source: HighWire-hosted journal article supplement (https://erj.ersjournals.com/content/60/5/2200260)
Supplement: inline-supplementary-material-2 [file inline-supplementary-material-2.pdf]

Supplementary Figures

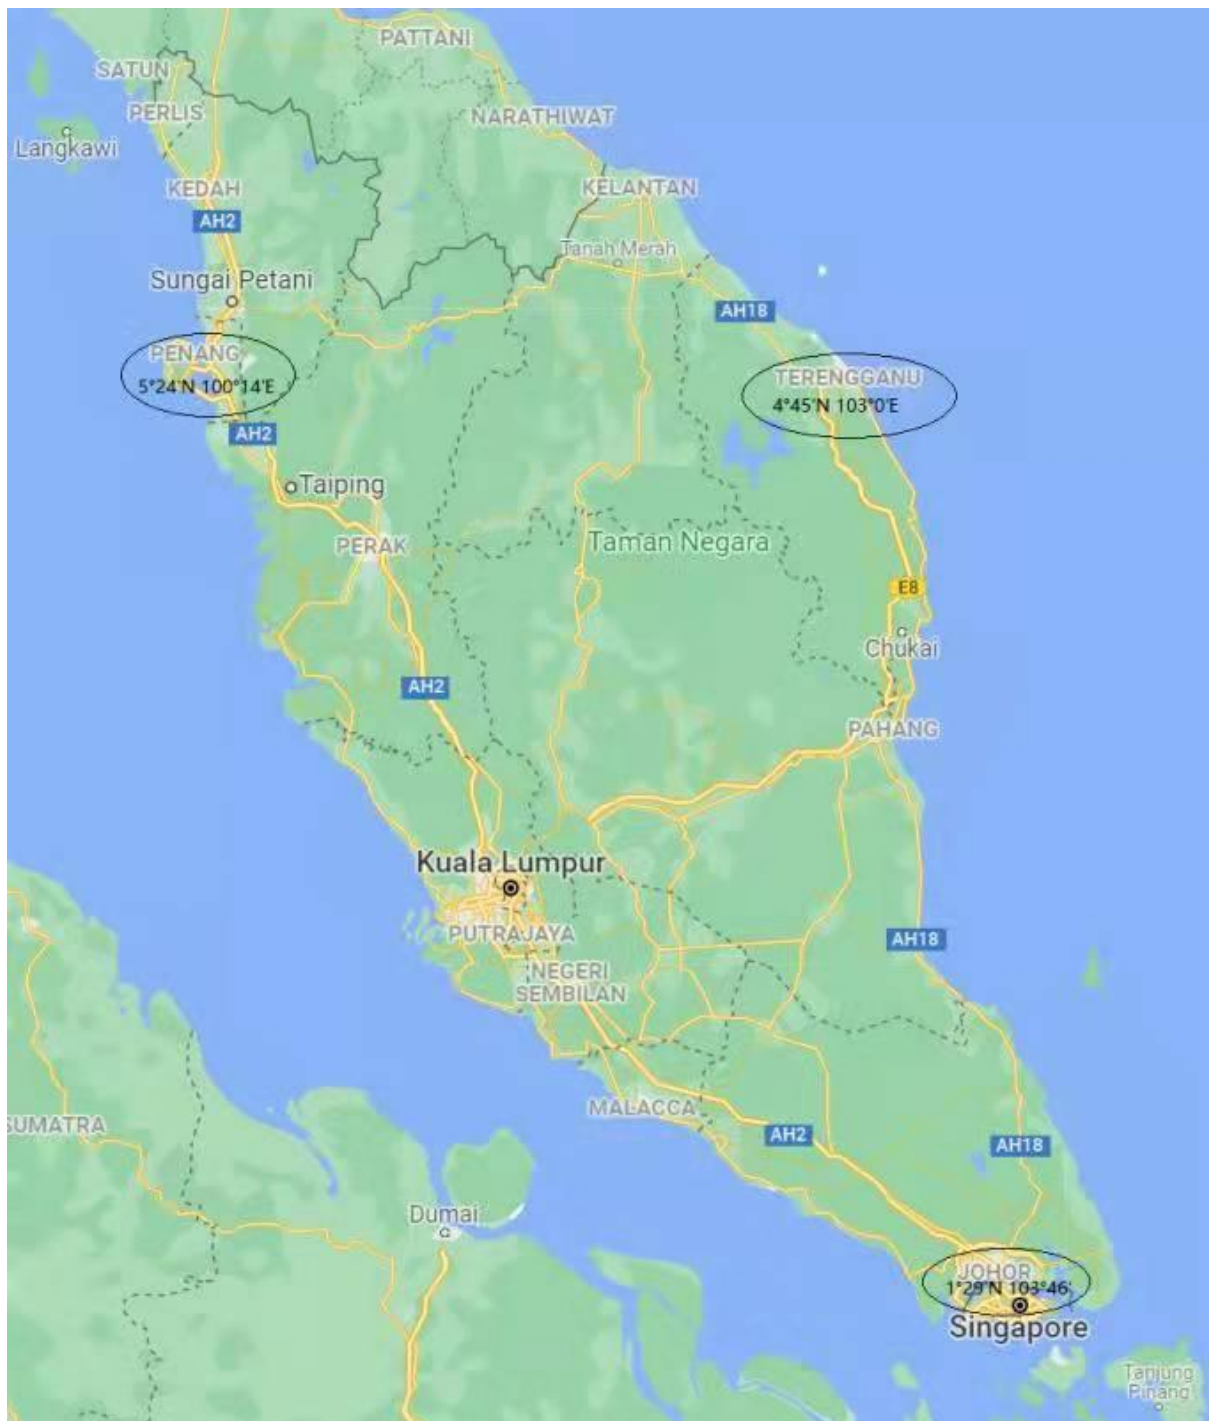

Figure S1. Geographic locations of Johor Bahru, Terengganu and Penang.

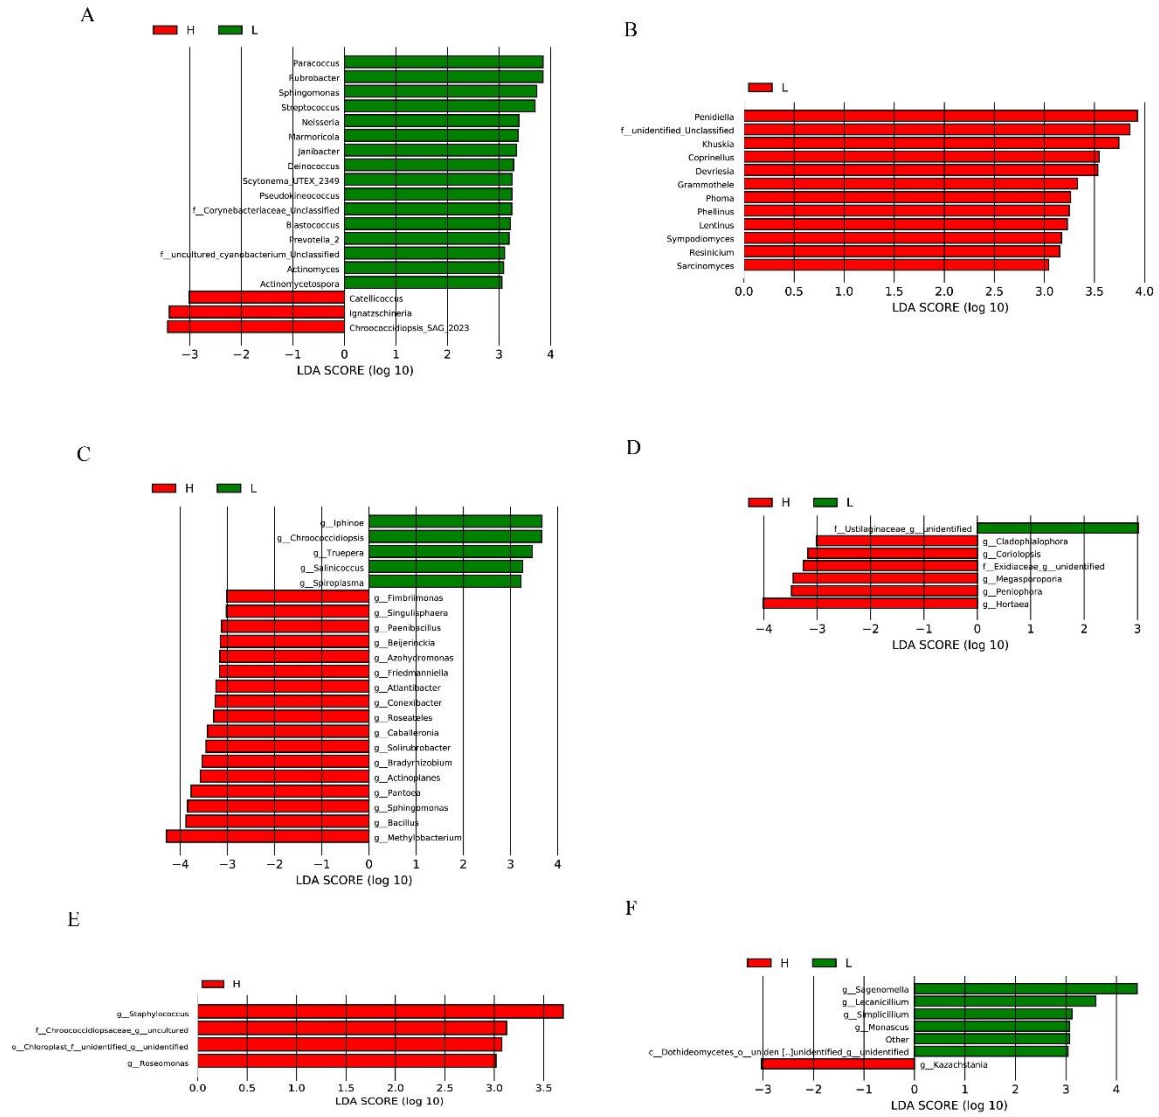

Figure S2. Microbial taxa enriched in schools with low asthma prevalence (L) and schools with high asthma prevalence (H). The analysis was calculated by LefSe (linear discriminant analysis effect size), and only taxa with LDA > 3 were presented in the figure. Enriched (A) bacterial and (B) fungal taxa in Johor Bahru. Enriched (C) bacterial and (D) fungal taxa in Terengganu. Enriched (E) bacterial and (F) fungal taxa in Penang.

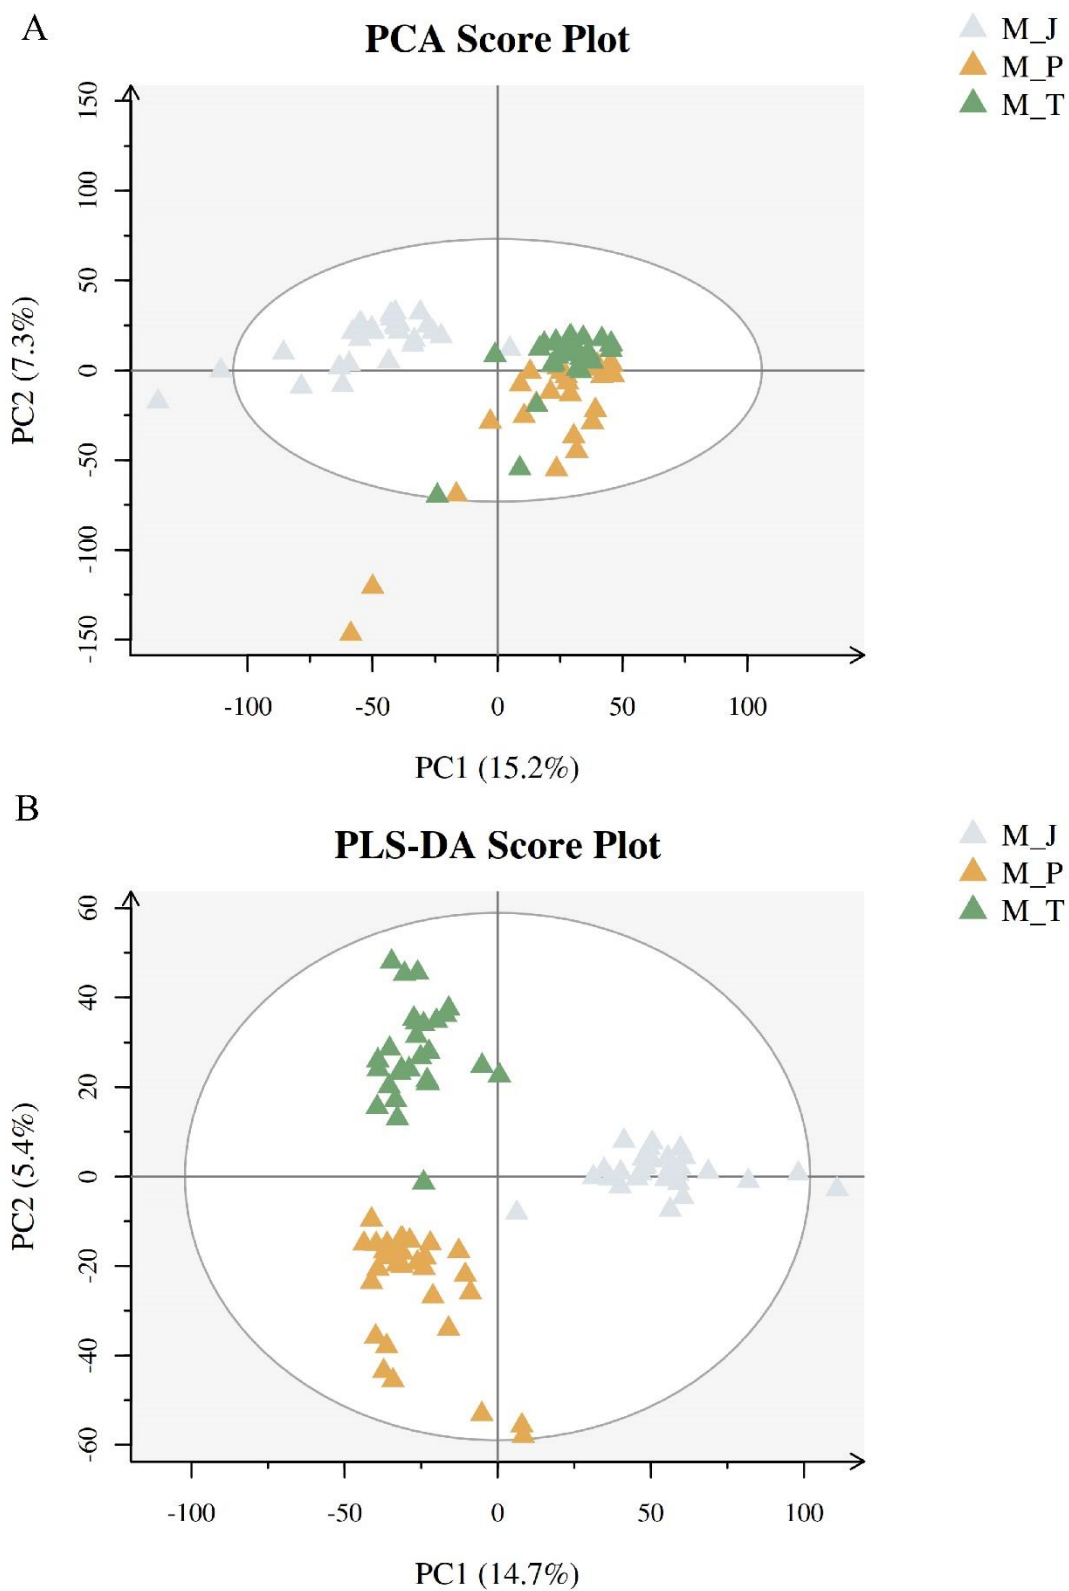

Figure S3. Ordination plot of environmental chemicals and metabolites in classroom dust in three centers of Malaysia. (A) Ordination plot by PCA (principal component analysis). (B) Ordination plot by PLS-DA (partial least squares discriminant analysis).
